# Supplementary material for: Virus-triggered exacerbation in allergic asthmatic children: neutrophilic airway inflammation and alteration of virus sensors characterize a subgroup of patients
Source: PubMed Central journal article supplement (PMC5686805; doi:10.1186/s12931-017-0672-0), 2017-11-14

**Additional file 1: Gating strategy for the analysis of conventional and plasmacytoid dendritic cell (cDC and pDC, respectively) in peripheral blood mononuclear cells (PBMC) from asthmatic children.**

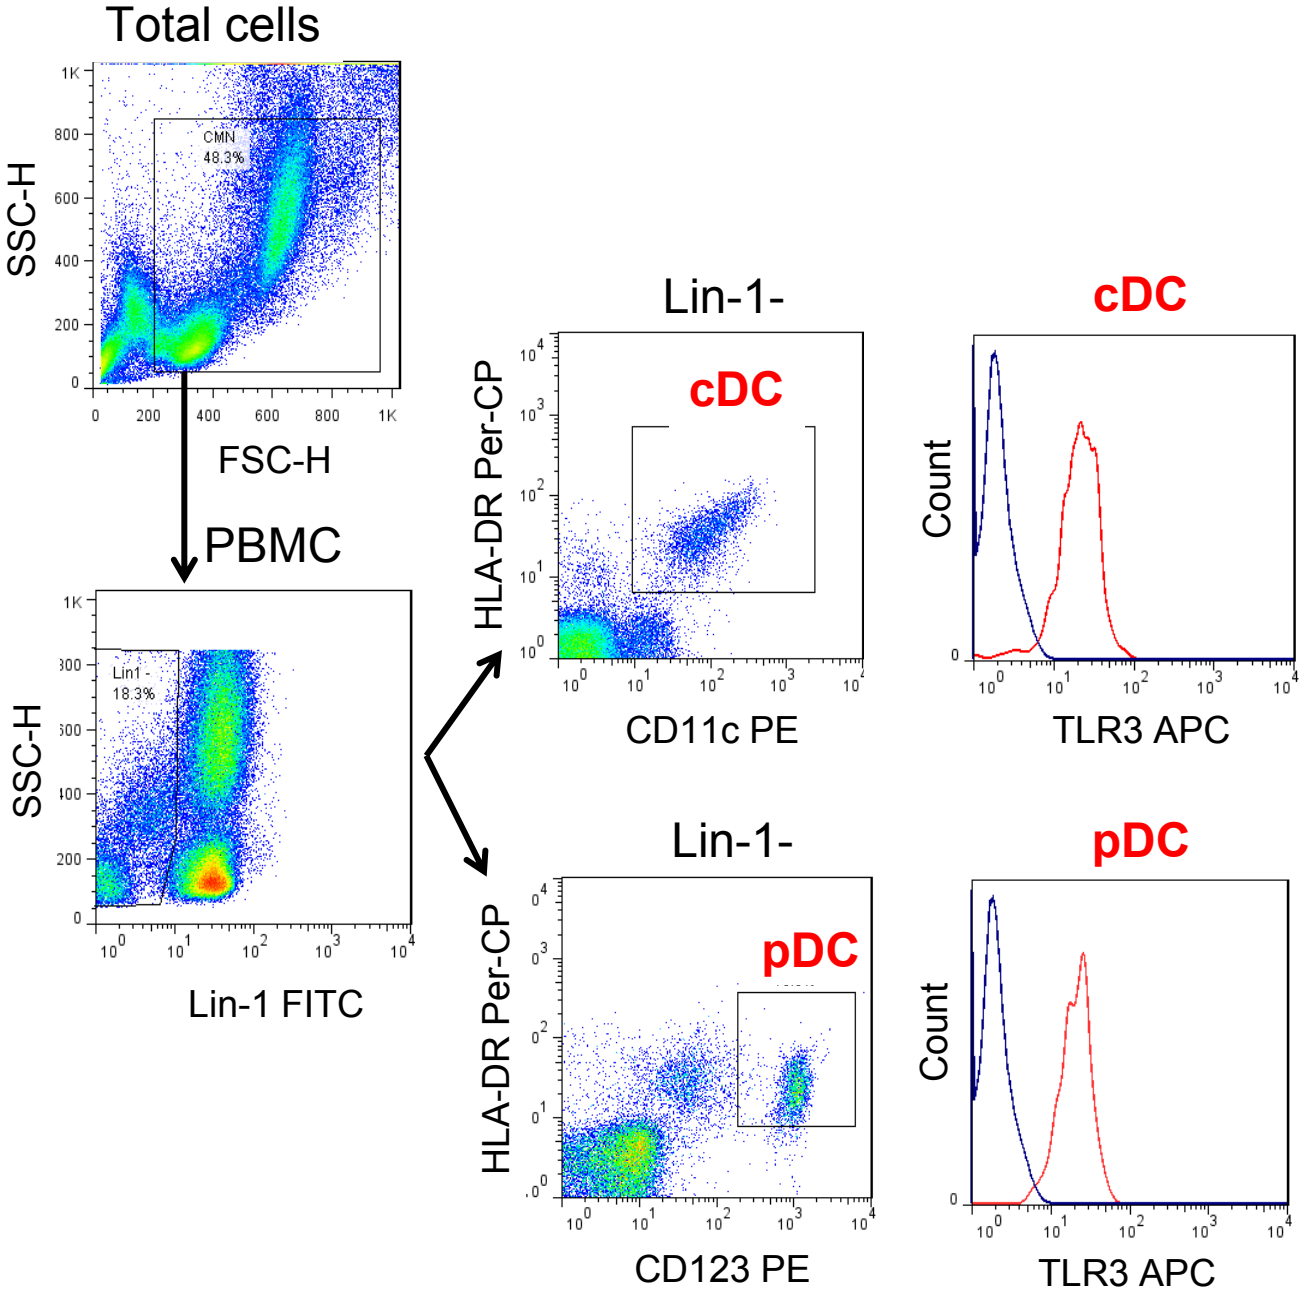

Supplement: 12931_2017_672_MOESM1_ESM.pdf [file 12931_2017_672_MOESM1_ESM.pdf]
