# Supplementary material for: Virus-triggered exacerbation in allergic asthmatic children: neutrophilic airway inflammation and alteration of virus sensors characterize a subgroup of patients
Source: PubMed Central journal article supplement (PMC5686805; doi:10.1186/s12931-017-0672-0), 2017-11-14
Supplement: 12931_2017_672_MOESM2_ESM.pdf [file 12931_2017_672_MOESM2_ESM.pdf]

**Additional file 2: Characteristics of the exacerbation at inclusion in the overall population and according to the viral status.**

|                                                  | All patients | V+          | V-          | V+V+        | V+V-        | p value* (ASD)<br>V+ versus V- | p value* (ASD)<br>V+V+ versus V+V- |
|--------------------------------------------------|--------------|-------------|-------------|-------------|-------------|--------------------------------|------------------------------------|
| <b>Median duration of hospitalization (days)</b> | 4<br>[2-15]  | 4<br>[2-11] | 5<br>[2-15] | 4<br>[2-11] | 4<br>[2-10] | 0.11<br>(40.4)                 | 0.72<br>(11.8)                     |
| <b>Median duration of oxygenotherapy (days)</b>  | 3<br>[0-10]  | 2<br>[0-10] | 3<br>[0-9]  | 2<br>[0-10] | 2<br>[0-9]  | 0.19<br>(33.0)                 | 0.80<br>(8.1)                      |

V+: identification of a virus (PCR) at the exacerbation, V-: no identification of a virus at the exacerbation, V+V+: identification of a virus at the exacerbation and at the steady state, V+V-: identification of a virus at the exacerbation but not at the steady state. Results are expressed as median with interquartile range between brackets. \* Data were compared via the Mann-Whitney test. ASD: absolute standardized difference (%).
